# Supplementary material for: PNPLA3 148M/M Is More Susceptible to Palmitic Acid-Induced Endoplasmic Reticulum Stress-Associated Apoptosis in HepG2 Cells
Source: Hindawi journal article supplement (doi:10.1155/2023/2872408), 2023-02-14
Supplement: f1 [file 2872408.f1.pdf]

PNPLA3 I148I knock-in cell lines

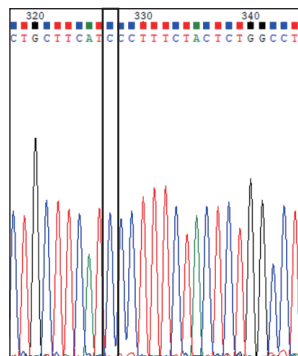

clone No. clone1

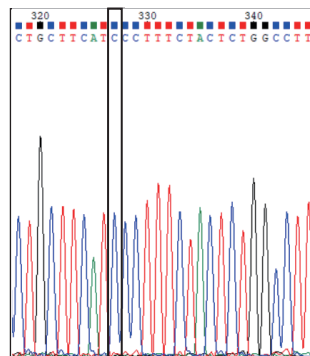

clone25

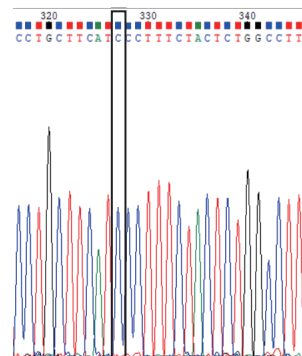

clone26

PNPLA3 I148M knock-in cell line

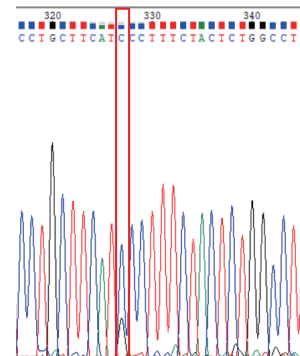

clone20
